# Supplementary material for: Skeletal muscle mass at C3 may not be a strong predictor for skeletal muscle mass at L3 in sarcopenic patients with head and neck cancer
Source: PubMed Central journal article supplement (PMC8289025; doi:10.1371/journal.pone.0254844), 2021-07-19

**(A)**

**HNC without sarcopenia**

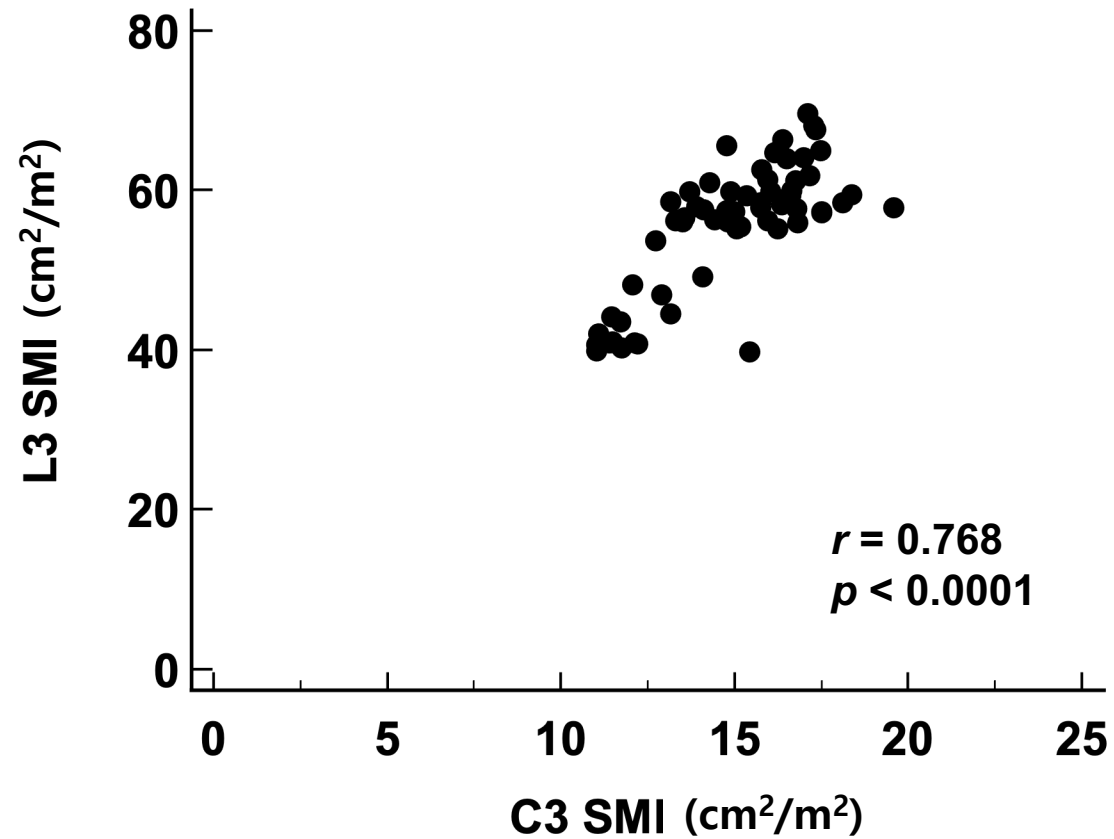

**(B)**

**HNC with sarcopenia**

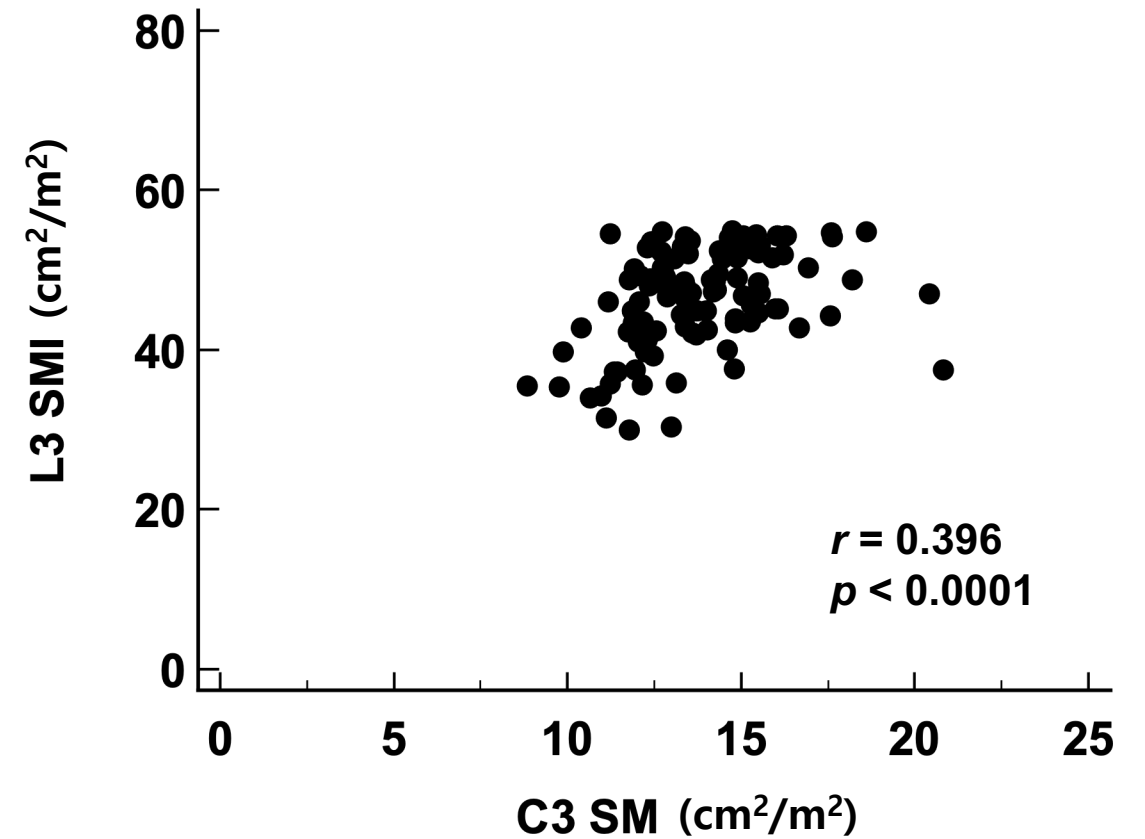

Supplement: pone.0254844.s002.pdf [file pone.0254844.s002.pdf]
