# Supplementary material for: Skeletal muscle mass at C3 may not be a strong predictor for skeletal muscle mass at L3 in sarcopenic patients with head and neck cancer
Source: PubMed Central journal article supplement (PMC8289025; doi:10.1371/journal.pone.0254844), 2021-07-19
Supplement: pone.0254844.s003.pdf [file pone.0254844.s003.pdf]

Supplementary table 1. Correlation between actual SMM and predicted SMM at L3 in each group (International cutoff)

|                | L3 SMM vs. predicted SMM |          |                  | L3 SMI vs. predicted SMI |          |                  |
|----------------|--------------------------|----------|------------------|--------------------------|----------|------------------|
|                | r                        | p-value  | CI               | r                        | p-value  | CI               |
| Non-sarcopenia | 0.9512                   | < 0.0001 | 0.9197 to 0.9706 | 0.8664                   | < 0.0001 | 0.7861 to 0.9179 |
| Sarcopenia     | 0.7852                   | < 0.0001 | 0.6982 to 0.8493 | 0.6309                   | < 0.0001 | 0.4990 to 0.7343 |
